# Supplementary material for: A new class of constitutively active super-enhancers is associated with fast recovery of 3D chromatin loops
Source: PubMed Central journal article supplement (PMC6439976; doi:10.1186/s12859-019-2646-3), 2019-03-29
Supplement: 12859_2019_2646_MOESM1_ESM.pdf [file 12859_2019_2646_MOESM1_ESM.pdf]

## Additional File 1

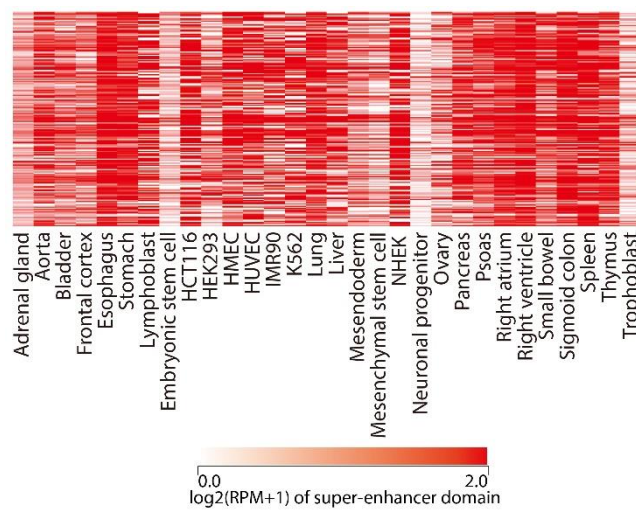

**Figure S1. Ubiquitous activity of super-enhancers defined in one cell/tissue type**

196 super-enhancer domains are called for only one cell/tissue type but showed constitutive H3K27ac signals across cell/tissue types and also located at less than 20% percentile of tau score. The heatmap of background subtracted log<sub>2</sub> transformed H3K27ac signals of the domains across cell/tissue types is shown.

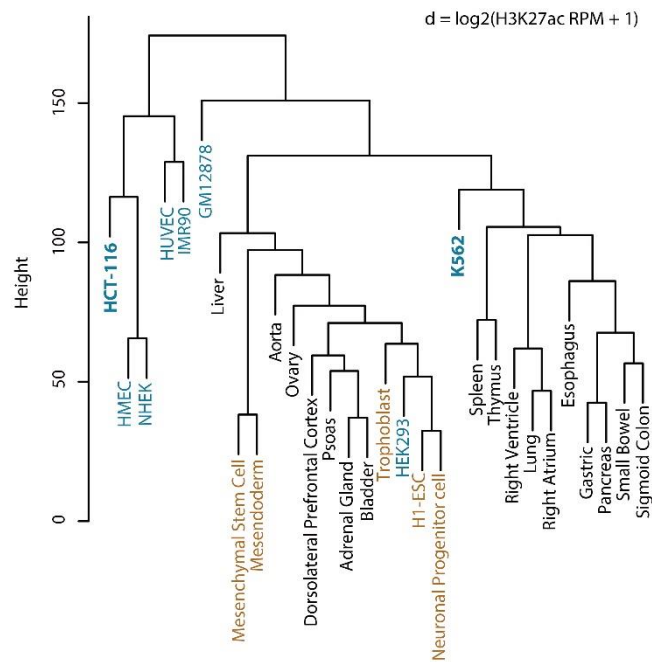

**Figure S2. Hierarchical clustering of samples using H3K27ac signal on super-enhancer domains.**

Complete-link hierarchical clustering of distance between samples with respect to  $\log_2$  transformed H3K27ac RPM of SE domains. H1 human embryonic cell line and its derived cell lines are shown in brown and immortalized cell lines are shown in blue. Cancer cell lines are shown in bold text.

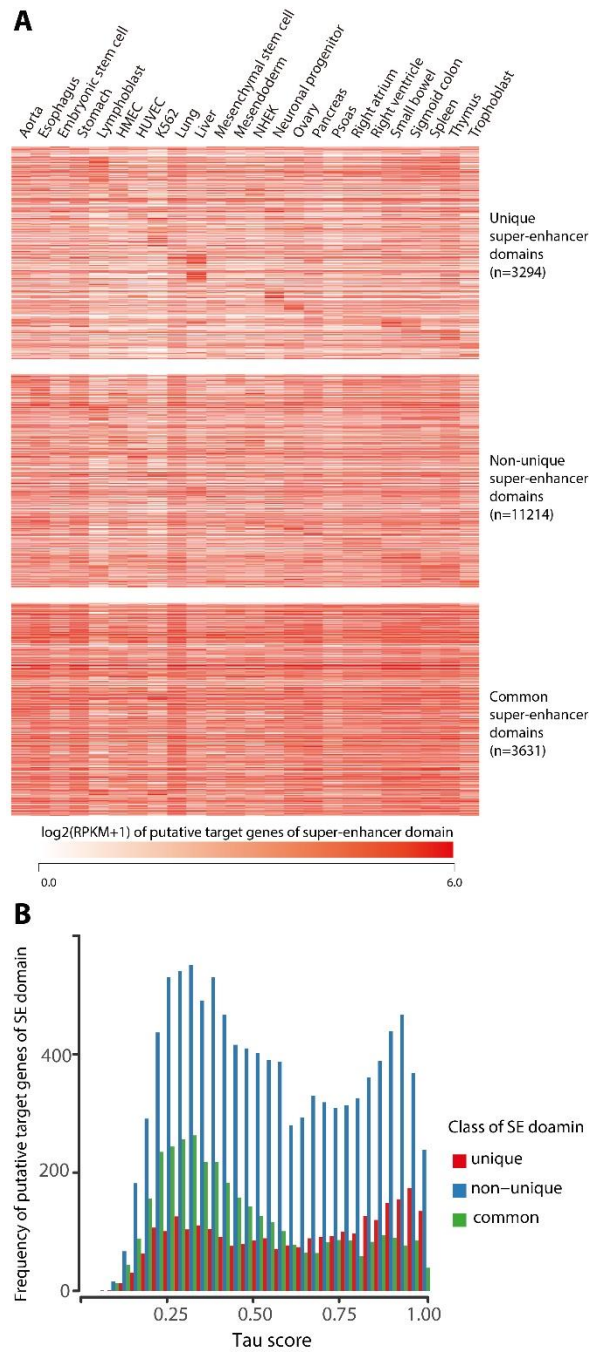

**Figure S3. Functional characterization of super-enhancer domain classes with alternative putative target genes**

**a**, Heatmaps showing log<sub>2</sub>(RPKM+1) value of putative target gene of unique super-enhancer domains (top), non-unique super-enhancer domains (middle), and common super-enhancer domains (bottom).

**b**, Histogram of tau score for putative target gene expression in each class of super-enhancer domains.

Low tau score indicates universal expression pattern.

**Supplementary tables:**

**Table S1. GO analysis of alternative putative target genes of unique super-enhancer domains**

|                                  | <b>Term</b>                                                       | <b>Fold enrichment</b> |
|----------------------------------|-------------------------------------------------------------------|------------------------|
| <b>GM12878<br/>(Lymphoblast)</b> | GO:0006955~immune response                                        | 3.56                   |
|                                  | GO:0032729~positive regulation of interferon-gamma production     | 11.3                   |
|                                  | GO:0031295~T cell costimulation                                   | 6.68                   |
|                                  | GO:0033209~tumor necrosis factor-mediated signaling pathway       | 4.96                   |
|                                  | GO:0006915~apoptotic process                                      | 2.30                   |
|                                  | GO:0071222~cellular response to lipopolysaccharide                | 4.61                   |
|                                  | GO:0042832~defense response to protozoan                          | 13.7                   |
|                                  | GO:0007165~signal transduction                                    | 1.74                   |
|                                  | GO:0060333~interferon-gamma-mediated signaling pathway            | 5.50                   |
|                                  | GO:0030154~cell differentiation                                   | 2.25                   |
|                                  | GO:0006954~inflammatory response                                  | 2.40                   |
|                                  | GO:0045893~positive regulation of transcription, DNA-templated    | 2.15                   |
|                                  | GO:0034138~toll-like receptor 3 signaling pathway                 | 24.4                   |
|                                  | GO:0045630~positive regulation of T-helper 2 cell differentiation | 24.4                   |
|                                  | GO:0040008~regulation of growth                                   | 3.52                   |
| <b>Prefrontal<br/>Cortex</b>     | GO:0007612~learning                                               | 11.6                   |
|                                  | GO:0010821~regulation of mitochondrion organization               | 30.5                   |
|                                  | GO:0008299~isoprenoid biosynthetic process                        | 28.3                   |
|                                  | GO:0007409~axonogenesis                                           | 6.75                   |
|                                  | GO:0009240~isopentenyl diphosphate biosynthetic process           | 132                    |
|                                  | GO:0050992~dimethylallyl diphosphate biosynthetic process         | 132                    |
|                                  | GO:0060221~retinal rod cell differentiation                       | 88.1                   |
|                                  | GO:0035434~copper ion transmembrane transport                     | 66.1                   |
|                                  | GO:0006695~cholesterol biosynthetic process                       | 10.4                   |
|                                  | GO:0060291~long-term synaptic potentiation                        | 10.4                   |
|                                  | GO:0007010~cytoskeleton organization                              | 4.11                   |
|                                  | GO:1901215~negative regulation of neuron death                    | 9.92                   |
|                                  | GO:0055069~zinc ion homeostasis                                   | 52.8                   |
|                                  | GO:0071287~cellular response to manganese ion                     | 44.0                   |
|                                  | GO:0009615~response to virus                                      | 4.81                   |

**Table S2. GO analysis of alternative putative target genes of common super-enhancer domains**

| <b>Term</b>                                                                     | <b>Fold Enrichment</b> | <b>p-value</b> |
|---------------------------------------------------------------------------------|------------------------|----------------|
| GO:0098609~cell-cell adhesion                                                   | 2.35                   | 1.92E-12       |
| GO:0000122~negative regulation of transcription from RNA polymerase II promoter | 1.62                   | 1.18E-07       |
| GO:0045944~positive regulation of transcription from RNA polymerase II promoter | 1.48                   | 1.92E-06       |
| GO:0008360~regulation of cell shape                                             | 2.08                   | 4.12E-03       |
| GO:0007179~transforming growth factor beta receptor signaling pathway           | 2.36                   | 4.66E-03       |
| GO:0030036~actin cytoskeleton organization                                      | 2.04                   | 1.54E-02       |
| GO:0048008~platelet-derived growth factor receptor signaling pathway            | 3.51                   | 1.55E-02       |
| GO:0001666~response to hypoxia                                                  | 1.85                   | 2.02E-02       |
| GO:0035556~intracellular signal transduction                                    | 1.52                   | 2.63E-02       |
| GO:0048870~cell motility                                                        | 3.68                   | 2.77E-02       |
| GO:0045668~negative regulation of osteoblast differentiation                    | 2.96                   | 3.11E-02       |

**Table S3. Source of H3K27ac and input ChIP-seq reads**

|                                 | <b>Full Name (Confirmed-181011)</b> | <b>H3K27ac</b> | <b>Input</b> |
|---------------------------------|-------------------------------------|----------------|--------------|
| <b>Tissue</b>                   | Adrenal gland                       | ENCFF965NCN    | ENCFF072EKO  |
|                                 | Aorta                               | ENCFF304OFY    | ENCFF883ZYF  |
|                                 | Bladder                             | ENCFF413QKU    | ENCFF770IYO  |
|                                 | Dorsolateral Prefrontal Cortex      | GSM1866052     | GSM1866054   |
|                                 | Esophagus                           | ENCFF972UCE    | ENCFF240RBR  |
|                                 | Stomach                             | ENCFF669MHN    | ENCFF404AFK  |
|                                 | Lung                                | ENCFF906WKZ    | ENCFF587OOH  |
|                                 | Liver                               | ENCFF007GTB    | ENCFF057IKR  |
|                                 | Ovary                               | ENCFF503FJZ    | ENCFF167BJI  |
|                                 | Pancreas                            | ENCFF996ECL    | ENCFF174XJR  |
|                                 | Psoas muscle                        | ENCFF823MZG    | ENCFF411YQM  |
|                                 | Right Atrium                        | ENCFF812IBZ    | ENCFF597CXC  |
|                                 | Right Ventricle                     | ENCFF004BQX    | ENCFF108OEG  |
|                                 | Small intestine                     | ENCFF308MVS    | ENCFF863QDS  |
|                                 | Sigmoid colon                       | ENCFF375GAE    | ENCFF347MJY  |
|                                 | Spleen                              | ENCFF063UMS    | ENCFF182DKW  |
|                                 | Thymus                              | ENCFF799IYC    | ENCFF043CYN  |
| <b>H1-ESC derived cell line</b> | H1-ESC                              | ENCFF000AWR    | ENCFF805KPU  |
|                                 | Mesenchymal stem cell               | ENCFF970HHO    | ENCFF317PIV  |
|                                 | Mesendoderm                         | ENCFF296LHG    | ENCFF250CGU  |
|                                 | Trophoblast                         | ENCFF613EXZ    | ENCFF312JHP  |
|                                 | Neural Stem Progenitor Cell         | ENCFF279KNT    | ENCFF591SDP  |
| <b>Immortalized cell line</b>   | GM12878                             | ENCFF000ASU    | ENCFF000ARK  |
|                                 | HCT-116                             | GSM2809617     | GSM3242978   |
|                                 | HEK293                              | ENCFF002ABC    | ENCFF000WXY  |
|                                 | HMEC                                | ENCFF000BIL    | ENCFF000BHF  |
|                                 | HUVEC                               | ENCFF000BSI    | ENCFF000BQW  |
|                                 | IMR90                               | ENCFF200XEH    | ENCFF855STX  |
|                                 | K562                                | ENCFF000BXH    | ENCFF000BWK  |
|                                 | NHEK                                | ENCFF000CNN    | ENCFF000CMD  |
